# Supplementary material for: Activated T cells sustain myeloid-derived suppressor cell-mediated immune suppression
Source: PubMed Central journal article supplement (PMC4811451; doi:10.18632/oncotarget.6662), 2015-12-18
Supplement: oncotarget-07-1168-s001.pdf [file oncotarget-07-1168-s001.pdf]

## Activated T cells sustain myeloid-derived suppressor cell-mediated immune suppression

### Supplementary Material

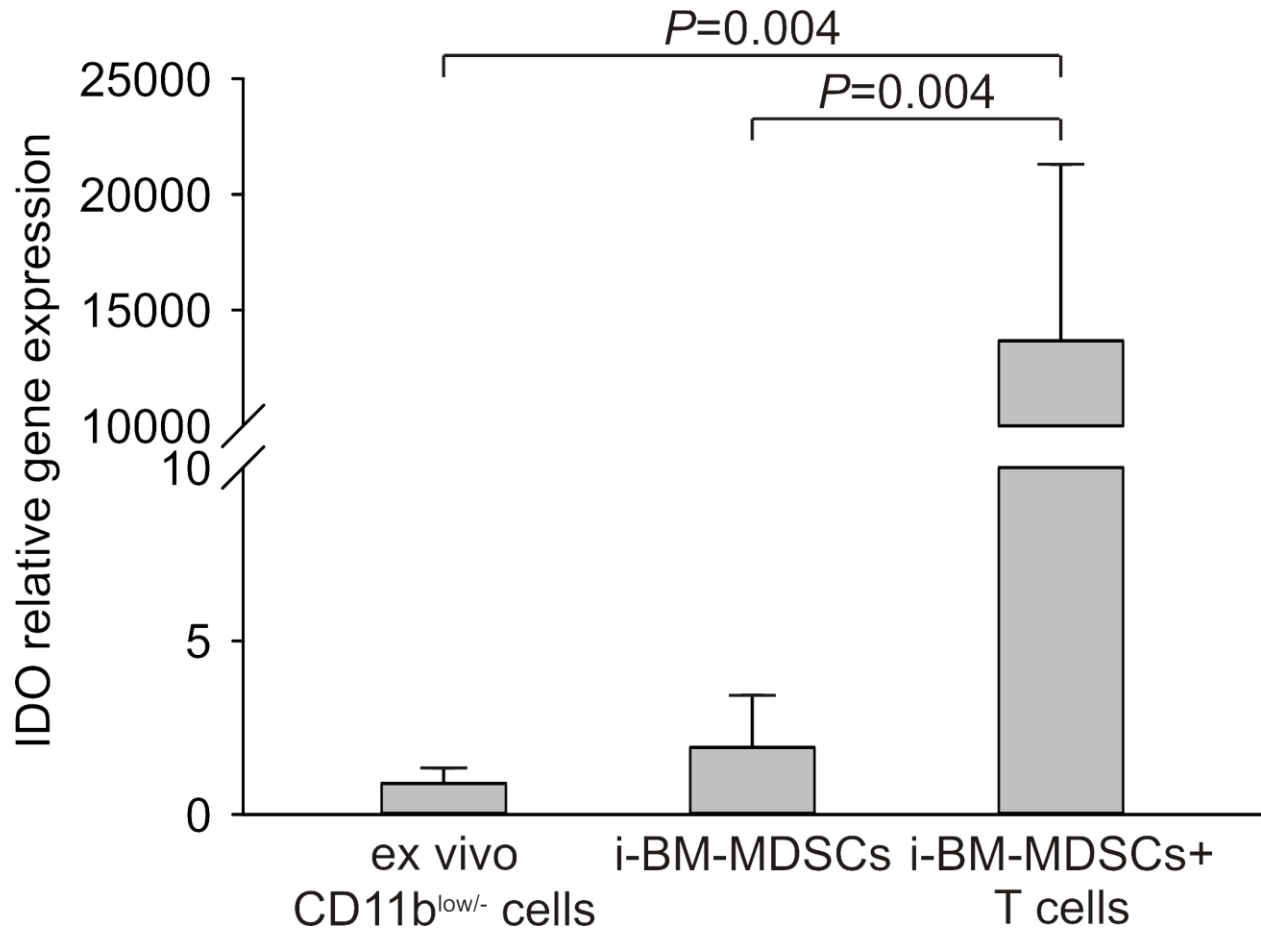

**Supplementary Figure 1: IDO expression on i-BM-MDSCs.** IDO expression levels were evaluated by real-time RT-PCR on CD11b<sup>low/-</sup> BM cells isolated *ex vivo*, on i-BM-MDSCs and on the same cells isolated after 20 hours of co-culture with activated T cells. Mann-Whitney U test was applied.
